# Supplementary material for: Transgenic and genome-edited fruits: background, constraints, benefits, and commercial opportunities
Source: Hortic Res. 2021 Jul 17;8:166. doi: 10.1038/s41438-021-00601-3 (PMC8286259; doi:10.1038/s41438-021-00601-3)
Supplement: Supplementary file 2 — Table S2 [file 41438_2021_601_MOESM2_ESM.pdf]

**Supplementary Information**

**Table S2**

**Transgenic and genome edited fruits: background, constraints, benefits and commercial opportunities**

Maria Lobato-Gómez<sup>1</sup>, Seanna Hewitt<sup>2</sup>, Teresa Capell<sup>1</sup>, Paul Christou<sup>1,3</sup>, Amit Dhingra<sup>2</sup>, Patricia Sarai Girón-Calva<sup>1,\*</sup>

<sup>1</sup>Department of Crop and Forest Sciences, University of Lleida-Agrotecnio Center, 25198 Lleida, Spain.

<sup>2</sup>Department of Horticulture, Washington State University, PO Box 646414, Pullman, WA, United States

<sup>3</sup>ICREA, Catalan Institute for Research and Advanced Studies, 08010 Barcelona, Spain

\* Corresponding author:

Sarai Girón-Calva ([sarai.giron@udl.cat](mailto:sarai.giron@udl.cat))

Phone: + 34 973 70 25 00

**Table S2.** Fruit and fruit trees under development through genetic engineering and genome editing with potential socio-economic impact (until mid-2020). Gene delivery was through *Agrobacterium tumefaciens*-mediated transformation unless indicated otherwise.

| Species                                | Cultivar                         | Target trait                                                                                                                  | Target gene(s) and source                          | Encoded product and function                                                                                                                                                         | Modification strategy         | Outcome                                                                                                                                  | Type of study                            | Ref.                                                            |
|----------------------------------------|----------------------------------|-------------------------------------------------------------------------------------------------------------------------------|----------------------------------------------------|--------------------------------------------------------------------------------------------------------------------------------------------------------------------------------------|-------------------------------|------------------------------------------------------------------------------------------------------------------------------------------|------------------------------------------|-----------------------------------------------------------------|
| Tomato ( <i>Solanum lycopersicum</i> ) | 'MP-1'                           | Parthenocarp                                                                                                                  | AGL6                                               | Transcription factor regulator of parthenocarp                                                                                                                                       | CRISPR/Cas9                   | 100% of fruits of WT plants had more than 10 seeds, whereas 78-85% mutants had 0 seeds/fruit, and 5% mutants had less than 10 seed/fruit | Field trials                             | (Klap <i>et al.</i> , 2017)                                     |
| Apple ( <i>Malus x domestica</i> )     | 'Galaxy' and 'M26'               | Increased resistance to <i>Erwinia amylovora</i> , <i>Venturia inaequalis</i> and <i>Gymnosporangium juniperi-virginianae</i> | <i>NPR1-1</i>                                      | Protein regulating the expression of pathogenesis-related genes                                                                                                                      | Transgenesis (Overexpression) | Transformed lines had only 32-40% of shoot length infected, compared with 80% in control plants.                                         | Field trials                             | (Malnoy <i>et al.</i> , 2007)                                   |
| Banana ( <i>Musa</i> spp.)             | 'Sukali Ndiizi' and 'Mpologoma'. | Increased resistance to <i>Xanthomonas campestris</i> pv. <i>musacearum</i>                                                   | <i>Harp</i> from <i>Capsicum annuum</i>            | Hypersensitive response assisting protein                                                                                                                                            | Transgenesis (Overexpression) | No wilted leaves were observed in transgenic plants, most leaves in WT plants were wilted                                                | Greenhouse, Field trials                 | (Tripathi <i>et al.</i> , 2010, 2014)                           |
| Banana ( <i>Musa</i> spp.)             | 'Sukali Ndiizi' and 'Mpologoma'. | Increased resistance to <i>X. campestris</i> pv. <i>musacearum</i>                                                            | <i>Pflp</i> from <i>C. annuum</i>                  | Ferredoxin-like protein which increases resistance against bacterial pathogens by intensifying the production of active oxygen species and activation of the hypersensitive response | Transgenesis (Overexpression) | Transgenic lines evaluated did not have wilted leaves whereas control plants showed complete wilting                                     | Laboratory, Greenhouse, and Field trials | (Namukwaya <i>et al.</i> , 2012; Tripathi <i>et al.</i> , 2014) |
| Papaya ( <i>Carica papaya</i> )        | 'Maradol'                        | Fruit ripening                                                                                                                | ACC oxidase                                        | Enzyme involved in fruit ripening                                                                                                                                                    | Transgenesis (RNA silencing)  | Fruits did not ripen after 21 days on the tree, whereas WT did before 15 days on tree.                                                   | Field trials                             | (López-Gómez <i>et al.</i> , 2009)                              |
| Grapevine ( <i>Vitis vinifera</i> )    | '41B', 'SO4', and 'Chardonnay'   | Resistance to Grapevine fanleaf virus (GFLV)                                                                                  | CP of GFLV                                         | Coat protein (CP) of GFLV                                                                                                                                                            | Transgenesis (overexpression) | Three transgenic lines had 0% GFLV infection compared with 70% in the WT plants                                                          | Field trials                             | (Mauro <i>et al.</i> , 1995; Vigne, Komar and Fuchs, 2004)      |
| Tomato ( <i>Solanum lycopersicum</i> ) | 'M82' and 'Sweet 100'            | Harvest time                                                                                                                  | <i>SP5G</i>                                        | SELF-PRUNING 5G is a flowering repressor                                                                                                                                             | CRISPR/Cas9                   | Harvest time was reduced two weeks in <i>SP5G</i> -mutants compared to WT plants                                                         | Field trials                             | (Soyk <i>et al.</i> , 2017)                                     |
| Tomato ( <i>Solanum lycopersicum</i> ) | 'M82'                            | Shelf life                                                                                                                    | <i>ALC</i>                                         | Alcobaca is a natural occurring mutation related to long-shelf life                                                                                                                  | CRISPR/Cas9                   | Fruits of <i>ALC</i> -mutants had increased shelf-life (40 days) compared to fruits from WT plants                                       | Field trials                             | (Yu <i>et al.</i> , 2017)                                       |
| Apple ( <i>Malus x domestica</i> )     | 'Pinova'                         | Floral initiation                                                                                                             | <i>MADS4</i> from <i>Betula pendula</i> Roth.      | Regulator of floral meristem identity                                                                                                                                                | Transgenesis (Overexpression) | Flowering occurred within 3-4 months compared to ~2 years for WT trees                                                                   | Greenhouse                               | (Flachowsky <i>et al.</i> , 2007)                               |
| Apple ( <i>Malus x domestica</i> )     | 'Pinova'                         | Increased resistance to <i>E. amylovora</i>                                                                                   | <i>Dpo</i> from <i>E. amylovora</i> phage phi-Ea1h | Depolymerase that binds to the capsular extracellular polysaccharide (EPS) of <i>E. amylovora</i> and degrades the bacterial EPS polysaccharide                                      | Transgenesis (Overexpression) | Reduced susceptibility to <i>E. amylovora</i> was observed for some clones (23% decrease relative to WT)                                 | Greenhouse                               | (Flachowsky <i>et al.</i> , 2008)                               |

|                                                 |                                          |                                                                                    |                                                 |                                                                                                                          |                                          |                                                                                                                                                                                                                                                                                                                                                            |            |                                                    |
|-------------------------------------------------|------------------------------------------|------------------------------------------------------------------------------------|-------------------------------------------------|--------------------------------------------------------------------------------------------------------------------------|------------------------------------------|------------------------------------------------------------------------------------------------------------------------------------------------------------------------------------------------------------------------------------------------------------------------------------------------------------------------------------------------------------|------------|----------------------------------------------------|
| Apple<br>( <i>Malus pumila</i> )                | 'Greensleeves'<br>clone GS92             | Increased resistance<br>to drought and cold<br>stress                              | <i>MYB4</i> from <i>Oriza<br/>sativa</i>        | Transcription factor<br>regulating the expression<br>of genes involved in<br>biotic and abiotic stress<br>responses      | Transgenesis<br>(Overexpression)         | After 15 days of drought<br>the relative water content<br>decreased 15% in WT but<br>did not decrease in<br>transformed plants.<br>Glucose, fructose, sucrose<br>content was 35%, 30% and<br>38% higher in transgenic<br>plants relative to WT.<br>Proline content was 38%<br>higher in transgenic plants<br>relative to WT after 2 days<br>of cold stress | Greenhouse | (Pasquali <i>et al.</i> ,<br>2008)                 |
| Apple<br>( <i>Malus</i> ×<br><i>domestica</i> ) | 'A2',<br>'Gravenstein'<br>and 'McIntosh' | Decreased plant size                                                               | <i>GAI</i> from<br><i>Arabidopsis thaliana</i>  | Protein regulating plant<br>responses to gibberellins                                                                    | Transgenesis<br>(Overexpression)         | Stem length was reduced<br>79% for 'McIntosh', 75% for<br>'Gravenstein' and 47% for<br>'A2' relative to their WT<br>plants                                                                                                                                                                                                                                 | Greenhouse | (Zhu, Li and<br>Welander, 2008)                    |
| Apple<br>( <i>Malus</i> ×<br><i>domestica</i> ) | 'Gala' and<br>'Elstar'                   | Increased resistance<br>to <i>V. inaequalis</i>                                    | <i>HcrVf1</i> from <i>M.<br/>floribunda</i> 821 | Receptor-like protein<br>which forms a gene-for-<br>gene relationship with<br>races of <i>V. inaequalis</i>              | Transgenesis<br>(Overexpression)         | Of the 6 resistant lines<br>obtained, 4 lines had no<br>macroscopically visible<br>symptoms, 1 line had<br>hypersensitive pinpoints<br>and 1 line had chlorotic and<br>necrotic areas with no<br>sporulation                                                                                                                                               | Greenhouse | (Szankowski,<br>Waidmann, <i>et al.</i> ,<br>2009) |
| Apple<br>( <i>Malus</i> ×<br><i>domestica</i> ) | 'Pinova'                                 | Flowering                                                                          | <i>FT1</i>                                      | Flowering integrator                                                                                                     | Transgenesis<br>(Overexpression)         | Flowering was accelerated<br>2-3 weeks from flowering<br>induction to full bloom<br>relative to 45-48 weeks in<br>non-transgenic apple                                                                                                                                                                                                                     | Greenhouse | (Tränkner <i>et al.</i> ,<br>2010)                 |
| Apple<br>( <i>Malus</i> ×<br><i>domestica</i> ) | 'GL-3'                                   | Plant size                                                                         | <i>NAC1</i>                                     | Transcription factor<br>regulating plant size                                                                            | Transgenesis<br>(Overexpression)         | Transgenic plants were<br>31% shorter than the WT                                                                                                                                                                                                                                                                                                          | Greenhouse | (Jia <i>et al.</i> , 2018)                         |
| Apple<br>( <i>Malus</i> ×<br><i>domestica</i> ) | 'Bolero'                                 | Fruit shape                                                                        | <i>PI</i>                                       | Regulator of petal and<br>stamen identity                                                                                | Transgenesis<br>(Overexpression)         | Plants produced flattened<br>fruit because of reduced<br>cell growth (66%) at the<br>basipetal position of the<br>fruit                                                                                                                                                                                                                                    | Greenhouse | (Yao <i>et al.</i> , 2018)                         |
| Apple<br>( <i>Malus</i> ×<br><i>domestica</i> ) | 'Fuji Raku Raku'                         | Increased carotenoid<br>content                                                    | <i>DRX</i> from <i>A.<br/>thaliana</i>          | Enzyme involved in the<br>formation of methyl<br>erythritol phosphate, the<br>first precursor for plastid<br>isoprenoids | Transgenesis<br>(Overexpression)         | Transgenic seedlings<br>displayed up to 3-fold<br>increase in total<br>carotenoids compared to<br>WT, whereas transient<br>transformation of fruits<br>induced a 2-fold increment<br>in total carotenoids                                                                                                                                                  | Greenhouse | (Arcos <i>et al.</i> ,<br>2020)                    |
| Banana ( <i>Musa<br/>acuminata</i> )            | 'Rasthali'                               | Increased resistance<br>to Banana bunchy<br>top virus                              | <i>ihpRNA-Rep</i> and<br><i>ighRNA-ProRep</i>   | Viral master replication<br>initiation proteins                                                                          | Transgenesis<br>(Gene silencing)         | Absence of disease<br>symptoms in transgenic<br>plants after 6 months of<br>viruliferous aphid<br>inoculation                                                                                                                                                                                                                                              | Greenhouse | (Shekhawat,<br>Ganapathi and<br>Hadapad, 2012)     |
| Banana ( <i>Musa<br/>balbisiana</i> )           | 'Gonja Manjaya'                          | Silencing the latency<br>of the Banana streak<br>virus (BSV) in the<br>host genome | <i>eBSV</i>                                     | Endogenous BSV<br>integrated in the host<br>genome                                                                       | Targeted<br>mutagenesis<br>(CRISPR/Cas9) | Broken or continuous<br>streaks of yellow, chlorotic,<br>black, or brown color on<br>leaves appeared in all WT<br>control plants, whereas                                                                                                                                                                                                                  | Greenhouse | (Tripathi <i>et al.</i> ,<br>2019)                 |

|                                                                            |                            |                                                                                              |                                                   |                                                                                                         |                                                  |                                                                                                                                                           |            |                                  |
|----------------------------------------------------------------------------|----------------------------|----------------------------------------------------------------------------------------------|---------------------------------------------------|---------------------------------------------------------------------------------------------------------|--------------------------------------------------|-----------------------------------------------------------------------------------------------------------------------------------------------------------|------------|----------------------------------|
|                                                                            |                            |                                                                                              |                                                   |                                                                                                         |                                                  | 75% of edited plants remained asymptomatic                                                                                                                |            |                                  |
| Banana ( <i>Musa spp.</i> )                                                | 'Gros Michel'              | Plant size                                                                                   | <i>MAGA20ox2</i>                                  | Gene regulating gibberellin (GA) production                                                             | Targeted mutagenesis (CRISPR/Cas9)               | The height of edited plants was reduced 75% relative to WT                                                                                                | Greenhouse | (Shao <i>et al.</i> , 2020)      |
| Blueberry ( <i>Vaccinium corymbosum</i> )                                  | 'Aurora'                   | Flower development/Yield improvement                                                         | <i>SOC1K</i>                                      | Flowering integrator which also regulates plant growth and development                                  | Transgenesis (Overexpression)                    | Number of floral buds in transgenic plants increase by 150% compared to chilled WT                                                                        | Greenhouse | (Song and Chen, 2018)            |
| Blueberry ( <i>Vaccinium corymbosum</i> )                                  | 'Legacy'                   | Floral initiation                                                                            | <i>FLC3-like</i> from <i>M. domestica</i>         | Transcription factor that represses flowering genes                                                     | Transgenesis (Overexpression)                    | WT plants did not flower under non-chilling conditions, whereas transgenic plants had 37 flower clusters                                                  | Greenhouse | (Zong <i>et al.</i> , 2019)      |
| Cherry ( <i>Prunus avium</i> )                                             | 'Mazzard' and 'Longguan'   | Fruit size                                                                                   | <i>CYP78A9</i>                                    | Regulator of fruit size and organ development                                                           | Transgenesis (Gene silencing)                    | Fruit longitudinal diameter was reduced 56% whereas horizontal diameter was decreased 63% compared to WT                                                  | Greenhouse | (Qi <i>et al.</i> , 2017)        |
| Mexican lime ( <i>Citrus aurantifolia</i> )                                | N.A.                       | Increased resistance to Citrus tristeza virus (CTV)                                          | <i>p25CP</i>                                      | Coat protein of the CTV                                                                                 | Transgenesis (Overexpression)                    | 25-33% transgenic lines did not develop symptoms, whereas all control plants became infected                                                              | Greenhouse | (Dominguez <i>et al.</i> , 2002) |
| Trifoliolate orange ( <i>Poncirus trifoliata</i> )                         | N.A.                       | Floral initiation                                                                            | <i>CiFT</i>                                       | Floral integrator                                                                                       | Transgenesis (Overexpression)                    | Transgenic trees started to flower as early as 12 weeks after transfer to a greenhouse, whereas WT plants had longer (6-20 year) juvenile periods         | Greenhouse | (Endo <i>et al.</i> , 2005)      |
| Carrizo citrange ( <i>Citrus sinensis</i> x <i>Poncirus trifoliata</i> )   | N.A.                       | Plant stature                                                                                | <i>GA20ox1</i> sense and antisense                | Enzyme which catalyzes the conversion of the gibberellins GA12/GA53, to GA9/GA20                        | Transgenesis (Overexpression and gene silencing) | Branch length was longer in sense (120%) and shorter (50%) in antisense plants                                                                            | Greenhouse | (Fagoaga <i>et al.</i> , 2007)   |
| Trifoliolate orange ( <i>Poncirus trifoliata</i> )                         | N.A.                       | Parthenocarpy                                                                                | <i>MAC12.2</i> from <i>A. thaliana</i>            | Induces parthenocarpy                                                                                   | Transgenesis (Overexpression)                    | Seed number decreased 83% in transgenic plants relative to WT                                                                                             | Greenhouse | (Tan <i>et al.</i> , 2009)       |
| Mexican lime ( <i>Citrus aurantifolia</i> )                                | N.A.                       | Increased resistance to Citrus tristeza virus                                                | <i>3DF1</i> and <i>3CA5</i>                       | Monoclonal antibodies against CTV p25 major coat protein                                                | Transgenesis (Overexpression)                    | Transgenic plants had 40%-60% of virus propagations, whereas WGT plants showed 95% of virus propagation                                                   | Greenhouse | (Cervera <i>et al.</i> , 2010)   |
| Mexican lime ( <i>Citrus aurantifolia</i> )                                | N.A.                       | Increased resistance to Citrus tristeza virus (CTV)                                          | <i>3'p23+3'UTR</i> intron harpin from CTV         | RNA-binding protein involved in regulating the balance of plus and minus RNA strands during replication | Transgenesis (Overexpression)                    | 9%–56% of the propagations remaining uninfected, whereas all WT were symptomatic                                                                          | Greenhouse | (Lopez <i>et al.</i> , 2010)     |
| Citrumelo ( <i>Citrus paradisi</i> 'Duncan' x <i>Poncirus trifoliata</i> ) | 'Swingle'                  | Increased tolerance to drought stress                                                        | <i>P5CSF129A</i> gene from <i>V. aconitifolia</i> | Key enzyme for proline biosynthesis                                                                     | Transgenesis (Overexpression)                    | Proline content was 2.5-fold higher in transgenic plants than control plants                                                                              | Greenhouse | (de Campos <i>et al.</i> , 2011) |
| Sweet orange ( <i>Citrus sinensis</i> )                                    | 'Navelina' and 'Pineapple' | Increased resistance to <i>X. citri</i> subsp. <i>Citri</i> and <i>Penicillium digitatum</i> | <i>MTSE1</i> from <i>Citrus unshiu</i>            | Limonene synthase which catalyzes the formation of limonene                                             | Transgenesis (Downregulation)                    | The production of limonene decreased 85 times in transgenic fruits relative to control plants. The percentage of infected wounds with <i>P. digitatum</i> | Greenhouse | (Rodríguez <i>et al.</i> , 2011) |

|                                                                          |                          |                                                                         |                                                                                               |                                                                                                                                           |                                    |                                                                                                                                                                                        |            |                                |
|--------------------------------------------------------------------------|--------------------------|-------------------------------------------------------------------------|-----------------------------------------------------------------------------------------------|-------------------------------------------------------------------------------------------------------------------------------------------|------------------------------------|----------------------------------------------------------------------------------------------------------------------------------------------------------------------------------------|------------|--------------------------------|
|                                                                          |                          |                                                                         |                                                                                               |                                                                                                                                           |                                    | was 18.5% in transgenic fruits compared to 60% in control fruits. <i>X. citri</i> sp. <i>citri</i> , infected wounds in transgenic fruits was <10% compared to 65.7% in control fruits |            |                                |
| Sweet orange ( <i>Citrus sinensis</i> )                                  | 'Succari' and 'Bingtang' | Increased resistance to <i>X. axonopodis</i> pv. <i>citri</i>           | <i>pthA-nls</i>                                                                               | Pathogenesis gene encoding 3 nuclear localization signals that are critical for PthA's function and localization to the host cell nucleus | Transgenesis (Overexpression)      | Disease incidence of 23.3% for 'Succari' sweet orange and 33.3% for 'Bingtang', whereas control plants had 100% of disease incidence                                                   | Greenhouse | (Yang <i>et al.</i> , 2011)    |
| Grapefruit ( <i>Citrus paradisi</i> )                                    | 'Duncan'                 | Increased resistance to <i>Elsinoë fawcettii</i>                        | <i>attE</i> from <i>Hyalophora cecropia</i>                                                   | Attacin E is an antimicrobial peptide that increases membrane permeability in Gram negative bacteria                                      | Transgenesis (Overexpression)      | Control plants had >10 postules on each leaf, whereas transgenic plants had 4-6 postules per leaf                                                                                      | Greenhouse | (Mondal <i>et al.</i> , 2012)  |
| Sweet orange ( <i>Citrus sinensis</i> )                                  | 'Pineapple'              | Increased carotenoid content                                            | <i>Csb-CHX</i>                                                                                | β-carotene hydroxylase catalyzing the conversion of β-carotene to xanthophylls.                                                           | Transgenesis (Gene silencing)      | 26-fold increase of β-carotene in the pulp of transgenic fruits relative to WT                                                                                                         | Greenhouse | (Pons <i>et al.</i> , 2014)    |
| Sweet orange ( <i>Citrus sinensis</i> )                                  | 'Hamlin' and 'Valencia'  | Increased resistance to <i>Candidatus Liberibacter asiaticus</i> (CLas) | <i>NPR1</i> from <i>A. thaliana</i>                                                           | Regulator of transcription factors controlling pathogen-related gene expression and mediates the salicylic acid induced responses         | Transgenesis (Overexpression)      | Control trees tested positive for the presence of CLAs within 6 months after infection, whereas 46% of transgenic plants tested negative                                               | Greenhouse | (Dutt <i>et al.</i> , 2015)    |
| Carrizo citrange ( <i>Citrus sinensis</i> x <i>Poncirus trifoliata</i> ) | N.A.                     | Increased resistance to <i>X. citri</i> subsp. <i>Citri</i>             | <i>Mthionin</i>                                                                               | Modified thionin, cysteine-rich peptide which shows antibacterial activity                                                                | Transgenesis (Overexpression)      | Bacterial population in transgenic plants was <1E+5 log whereas in control plants was >1E+8 log                                                                                        | Greenhouse | (Hao, Stover and Gupta, 2016)  |
| Blood orange ( <i>Citrus sinensis</i> Osbeck)                            | 'Tarocco'                | Increased resistance to <i>Candidatus Liberibacter asiaticus</i> (CLas) | <i>CB</i> , <i>PR1aCB</i> and <i>PR1aCBer</i> from <i>Antheraea pernyi</i>                    | Cecropin B, antimicrobial cationic lytic peptide                                                                                          | Transgenesis (Overexpression)      | Bacterial populations were not detected in transgenic lines, whereas bacterial population were detected in WT (31.2 vs. 16 Ct for bacterial 16S gene, respectively)                    | Greenhouse | (Zou <i>et al.</i> , 2017)     |
| Blood orange ( <i>Citrus sinensis</i> Osbeck)                            | 'Wanjincheng'            | Increased resistance to <i>X. citri</i> subsp. <i>Citri</i>             | <i>WRKY22</i>                                                                                 | Transcription factor involved in the regulation of plant responses to biotic stress                                                       | Targeted mutagenesis (CRISPR/Cas9) | Smaller diseased areas were found in transgenic plants (0.80 mm <sup>2</sup> ), compared with the WT (1.60 mm <sup>2</sup> )                                                           | Greenhouse | (L. Wang <i>et al.</i> , 2019) |
| Grapevine ( <i>Vitis berlandieri</i> x <i>Vitis rupestris</i> )          | 'Richter'                | Tolerance to salinity and oxidative stress                              | <i>MsFer</i> from <i>Medicago sativa</i>                                                      | Ferritin iron-storing protein                                                                                                             | Transgenesis (overexpression)      | Transgenic plants showed 30% lower loss of photosynthetic activity than control plants under salinity and oxidative (paraquat) stress                                                  | Greenhouse | (Zok <i>et al.</i> , 2010)     |
| Kiwifruit ( <i>Actinidia deliciosa</i> )                                 | 'Hayward'                | Increased carotenoid content                                            | <i>GGPS</i> , <i>PDS</i> , <i>ZDS</i> , <i>CHX</i> , and <i>PSY</i> from <i>Citrus unshiu</i> | Geranylgeranyl diphosphate synthase, phytoene desaturase, ζ-carotene desaturase, β-carotene hydroxylase, and phytoene synthase.           | Transgenesis (overexpression)      | Lutein and β-carotene content increased 1.2 and 1.3-fold, respectively, in transgenic plants compared to control plants                                                                | Greenhouse | (Kim <i>et al.</i> , 2010)     |

|                                        |                  |                                                                                                |                                            |                                                                                                     |                                                  |                                                                                                                                                                    |            |                                    |
|----------------------------------------|------------------|------------------------------------------------------------------------------------------------|--------------------------------------------|-----------------------------------------------------------------------------------------------------|--------------------------------------------------|--------------------------------------------------------------------------------------------------------------------------------------------------------------------|------------|------------------------------------|
|                                        |                  |                                                                                                |                                            | Enzymes involved in carotenoid biosynthesis                                                         |                                                  |                                                                                                                                                                    |            |                                    |
| Ks                                     | 'Qin mei'        | Increase tolerance to salinity stress                                                          | <i>NHX1</i> from <i>A. thaliana</i>        | Vacuolar Na <sup>+</sup> /H <sup>+</sup> antiporter                                                 | Transgenesis (overexpression)                    | Transgenic kiwifruit plants had 2 times more leaf Na <sup>+</sup> and K <sup>+</sup> under 200 mmol/l NaCl relative to WT                                          | Greenhouse | (Tian, Wang and Xu, 2011)          |
| Melon ( <i>Cucumis melo</i> )          | 'Silver Light'   | Increased resistance to Papaya ringspot virus (PRSV W) and Zucchini yellow mosaic virus (ZYMV) | Partial CP of PRSV W and ZYMV              | Partial coat proteins of PRSV W and ZYMV                                                            | Transgenesis (overexpression)                    | Transgenic plants did not exhibit any symptom after the inoculation with ZYMV and PRSV W, whereas 51% to 84% control plants showed symptoms                        | Greenhouse | (Wu <i>et al.</i> , 2010)          |
| Pear ( <i>Pyrus communis</i> )         | 'Passe Crassane' | Increased resistance to <i>E. amylovora</i>                                                    | Bovine Lactoferrin                         | Iron chelator protein with bactericidal action                                                      | Transgenesis (overexpression)                    | Symptoms of fire blight infection decreased up to 60% in transgenic plants compared to control plants                                                              | Greenhouse | (Malnoy <i>et al.</i> , 2003)      |
| Pear ( <i>Pyrus communis</i> )         | 'La France'      | Ethylene production                                                                            | ACO                                        | 1-aminocyclopropane-1-carboxylic acid oxidase involved in ethylene biosynthesis                     | Transgenesis (overexpression and gene silencing) | ACO (antisense) mutants had decreased ethylene production of up to 85% relative to control shoots, whereas ACO overexpression increased ethylene production 200%   | Greenhouse | (Gao <i>et al.</i> , 2007)         |
| Pear ( <i>Pyrus communis</i> )         | 'Spadona'        | Floral initiation                                                                              | <i>TFL1-1</i> and <i>TFL1-2</i>            | Floral repressor                                                                                    | Transgenesis (gene silencing)                    | Flowers in a transgenic line developed 1-8 months after transfer to greenhouse in a transgenic line, whereas control plants did not flower                         | Greenhouse | (Freiman <i>et al.</i> , 2012)     |
| Pear ( <i>Pyrus communis</i> )         | 'Old Home'       | Tocopherol production                                                                          | <i>VTE1</i> from <i>Juglans regia</i>      | Tocopherol cyclase VTE1 is a key enzyme involved in tocopherol production                           | Transgenesis (overexpression)                    | Transgenic pear plants accumulated tocopherol 2.3-fold higher in roots, and 16.2-fold higher in stem tissues relative to WT                                        | Greenhouse | (Wang <i>et al.</i> , 2015)        |
| Chili pepper ( <i>Capsicum annum</i> ) | 'Aiswarya 2103'  | Increased tolerance to salinity stress                                                         | Osmotin from <i>Nicotiana tabacum</i>      | Pathogenesis-related protein induced under abiotic stress                                           | Transgenesis (overexpression)                    | Under salinity stress, control plants produced 2.2 kg of chili pepper fruits per plant, whereas transgenic plants produced 3.3 kg of chili pepper fruits per plant | Greenhouse | (Subramanyam <i>et al.</i> , 2011) |
| Chili pepper ( <i>Capsicum annum</i> ) | 'Nokkwang'       | Increased resistance to <i>Colletotrichum gloeosporioides</i>                                  | <i>J1-1</i>                                | Antimicrobial peptide (defensin) that inhibits the growth of a broad range of phytopathogenic fungi | Transgenesis (overexpression)                    | Transgenic fruits exhibited 25% less anthracnose lesions compared to control plants                                                                                | Greenhouse | (Seo <i>et al.</i> , 2014)         |
| Chili pepper ( <i>Capsicum annum</i> ) | 'G4'             | Increased tolerance to salinity stress                                                         | <i>NHX2</i> from <i>Triticum aestivum</i>  | Na <sup>+</sup> /H <sup>+</sup> antiporter                                                          | Transgenesis (overexpression)                    | Transgenic plants exhibited 13% less ion leakage than WT plants under 100mM of NaCl                                                                                | Greenhouse | (Bulle, Yarra and Abbagani, 2016)  |
| Chili pepper ( <i>Capsicum annum</i> ) | 'Nokkang'        | Increased resistance to <i>C. letotrichum gloeosporioides</i>                                  | <i>EST</i>                                 | Esterase enzyme that acts on components of the fungus and/or plant cell                             | Transgenesis (overexpression)                    | Transgenic fruits exhibited 35% less disease rate than control plants                                                                                              | Greenhouse | (Ko <i>et al.</i> , 2016)          |
| Plum ( <i>Prunus domestica</i> )       | N.A.             | Chilling requirement                                                                           | <i>FT1</i> from <i>Populus trichocarpa</i> | Flowering Locus T1 coordinates vegetative and reproductive growth                                   | Transgenesis (overexpression)                    | Transgenic plants flowered and produced fruits in greenhouse within 1 to 10 months. Plants did not enter dormancy after cold                                       | Greenhouse | (Srinivasan <i>et al.</i> , 2012)  |

|                                           |                                                         |                                                                    |                                                                             |                                                                                                                                               |                                                  | treatment                                                                                                                                                                                                                   |            |                                             |
|-------------------------------------------|---------------------------------------------------------|--------------------------------------------------------------------|-----------------------------------------------------------------------------|-----------------------------------------------------------------------------------------------------------------------------------------------|--------------------------------------------------|-----------------------------------------------------------------------------------------------------------------------------------------------------------------------------------------------------------------------------|------------|---------------------------------------------|
| Plum ( <i>Prunus domestica</i> )          | 'Startovaya'                                            | Increased resistance to Plum pox virus (PPV)                       | Hairpin of <i>PPV-CP</i>                                                    | PPV coat protein derived hairpin construct                                                                                                    | Transgenesis (gene silencing)                    | Transgenic trees were used as rootstock. Grafted trees remained uninfected over 9 years                                                                                                                                     | Greenhouse | (Sidorova <i>et al.</i> , 2019)             |
| Strawberry ( <i>Fragaria × ananassa</i> ) | 'Calypso'                                               | Flavonoid content                                                  | <i>CHS</i> (antisense)                                                      | Chalcone synthase, involved in flavonoid biosynthesis                                                                                         | Transgenesis (gene silencing)                    | Flavonoid content decreased 50% in transgenic lines compared with control plants                                                                                                                                            | Greenhouse | (Lunkenbein <i>et al.</i> , 2006)           |
| Strawberry ( <i>Fragaria × ananassa</i> ) | 'Anther'                                                | Sugar composition and content                                      | <i>AGPase FagpS</i>                                                         | ADP-glucose pyrophosphorylase small subunit involved in starch biosynthesis                                                                   | Transgenesis (gene silencing)                    | Starch content decrease 27-47% in transgenic plants relative to control plants, whereas soluble sugars increased 16-37%                                                                                                     | Greenhouse | (Park <i>et al.</i> , 2006)                 |
| Strawberry ( <i>Fragaria × ananassa</i> ) | 'Anther'                                                | Fruit softening                                                    | <i>Cel1</i>                                                                 | Endo-β-(1,4)-glucanase involved in fruit cell wall degradation during fruit ripening                                                          | Transgenesis (overexpression and gene silencing) | Firmness increased 16-36% and 22-25% in transgenic plants (antisense) (at the turning and red stage, respectively) relative to control plants                                                                               | Greenhouse | (Lee and Kim, 2011)                         |
| Wild strawberry ( <i>Fragaria vesca</i> ) | 'Ruegen'                                                | Phosphorous content                                                | <i>miR399</i>                                                               | MicroRNA399 involved in the regulation of phosphate homeostasis                                                                               | Transgenesis (overexpression)                    | Phosphorous content increased 1.1-fold to 2.1-fold in leaves and fruits of transgenic plants relative to WT plants                                                                                                          | Greenhouse | (Y. Wang <i>et al.</i> , 2017)              |
| Strawberry ( <i>Fragaria × ananassa</i> ) | 'Reine des Vellés'                                      | Flower development                                                 | <i>TM6</i>                                                                  | Transcription factor regulating flower development                                                                                            | CRISPR/Cas9                                      | Transgenic plants had 75% less pollen grains than WT plants                                                                                                                                                                 | Greenhouse | (Martín-Pizarro, Triviño and Posé, 2019)    |
| Tomato ( <i>Solanum lycopersicum</i> )    | 'VF36'                                                  | Increased resistance to <i>X. campestris</i> (Xcv)                 | <i>Bs2</i> from <i>Capsicum annuum</i>                                      | Member of the nucleotide binding site–leucine-rich repeat (NBS-LRR) class of R genes. Recognizes and confers resistance to <i>Xanthomonas</i> | Transgenesis (overexpression)                    | Transgenic plants lack chlorotic disease symptoms on leaves inoculated with Xcv (visual evaluation)                                                                                                                         | Greenhouse | (Tai <i>et al.</i> , 1999)                  |
| Tomato ( <i>Solanum lycopersicum</i> )    | 'Money Maker', 'Rio Grande–PtoS', and 'Rio Grande–PtoR' | Increased resistance to <i>Pseudomonas syringae</i>                | <i>Pto</i>                                                                  | Serine/threonine protein kinase involved in the activation of the hypersensitive response against bacterial pathogens                         | Transgenesis (overexpression)                    | Bacterial number was 10-fold lower in 48-2 than in Money Maker s, and 10- to 50-fold lower in 11-12 and 13-8 than in PtoR and PtoS                                                                                          | Greenhouse | (Tang <i>et al.</i> , 1999)                 |
| Tomato ( <i>Solanum lycopersicum</i> )    | 'Micro-Tom'                                             | Increased tolerance to drought stress                              | <i>PIP1;3</i> from <i>Malus domestica</i>                                   | Aquaporin, a water channel                                                                                                                    | Transgenesis (overexpression)                    | Transgenic lines had 20% more mass than WT after 20 days of drought                                                                                                                                                         | Greenhouse | (L. Wang <i>et al.</i> , 2017)              |
| Tomato ( <i>Solanum lycopersicum</i> )    | 'FL8000'                                                | Increased resistance to <i>P. syringae</i> and <i>X. perforans</i> | <i>DMR6</i>                                                                 | Downy mildew resistance 6 is associated with salicylic acid homeostasis                                                                       | CRISPR/Cas9                                      | <i>DMR6</i> -mutants had lower levels of <i>P. syringae</i> (5.8 log CFU/ cm <sup>2</sup> ) and <i>X. perforans</i> (4.2 log CFU/ cm <sup>2</sup> ) compared to WT plants (7 and 6 log CFU/ cm <sup>2</sup> , respectively) | Greenhouse | (de Toledo Thomazella <i>et al.</i> , 2016) |
| Tomato ( <i>Solanum lycopersicum</i> )    | N.A.                                                    | Fruit ripening                                                     | <i>ORRM4</i>                                                                | ORRM proteins regulates plant growth, flowering time, and fruit ripening                                                                      | CRISPR/Cas9                                      | Fruit ripening was delayed 10 days in <i>ORRM</i> -mutants compared to WT fruits                                                                                                                                            | Greenhouse | (Yang <i>et al.</i> , 2017)                 |
| Tomato ( <i>Solanum lycopersicum</i> )    | 'AC'                                                    | Lycopene content                                                   | <i>SGR1</i> , <i>LCY-E</i> , <i>Blc</i> , <i>LCY-B1</i> , and <i>LCY-B2</i> | Key enzymes of lycopene and β- and α-carotene biosynthesis                                                                                    | CRISPR/Cas9                                      | Lycopene content increased 5.1-fold in fruits from mutants plants                                                                                                                                                           | Greenhouse | (X. Li <i>et al.</i> , 2018)                |

|                                                    |                                                     |                                                                                                                               |                                                                                         |                                                                                                                                                      |                                  |                                                                                                                                                                                                                                                                                                                                     |            |                                                        |
|----------------------------------------------------|-----------------------------------------------------|-------------------------------------------------------------------------------------------------------------------------------|-----------------------------------------------------------------------------------------|------------------------------------------------------------------------------------------------------------------------------------------------------|----------------------------------|-------------------------------------------------------------------------------------------------------------------------------------------------------------------------------------------------------------------------------------------------------------------------------------------------------------------------------------|------------|--------------------------------------------------------|
| Tomato<br>( <i>Solanum lycopersicum</i> )          | 'LA1589',<br>'LA1357',<br>'LA1547', and<br>'LA1606' | Inflorescence, Fruit<br>size and Vitamin C<br>content                                                                         | <i>SP5G</i> , <i>SP</i> , <i>CLV3</i> ,<br><i>WUS</i> , and <i>GGP1</i>                 | Key regulators of<br>flowering and fruit locule<br>number, key enzyme<br>involved in vitamin C<br>biosynthesis                                       | CRISPR/Cas9                      | compared to control fruits<br>In edited plants, the first<br>inflorescence appeared<br>after 7 leaves (compared to<br>12 leaves in WT), 5–12%<br>of fruits had three locules,<br>and vitamin C decreased<br>48% relative to WT plants                                                                                               | Greenhouse | (T. Li <i>et al.</i> ,<br>2018)                        |
| Tomato<br>( <i>Solanum lycopersicum</i> )          | 'Ailsa Craig' and<br>'Micro-Tom'                    | γ-Aminobutyric acid<br>(GABA) content                                                                                         | <i>TP1</i> , <i>TP2</i> , <i>TP3</i> ,<br><i>CAT9</i> , and <i>SSADH</i>                | Key enzymes involved<br>GABA metabolism                                                                                                              | CRISPR/Cas9                      | GABA content increased<br>19-fold in mutant plants<br>compared with WT plants                                                                                                                                                                                                                                                       | Greenhouse | (R. Li <i>et al.</i> ,<br>2018)                        |
| Wild tomato<br>( <i>Solanum pimpinellifolium</i> ) | N.A.                                                | Plant morphology,<br>fruit number and<br>size, lycopene<br>content                                                            | <i>SP</i> , <i>O</i> , <i>FW 2.2</i> ,<br><i>CycB</i> , <i>MULT</i> , and<br><i>FAS</i> | Key regulators of<br>flowering, fruit shape,<br>fruit size, fruit number,<br>key enzyme involved in<br>the conversion of<br>lycopene into β-carotene | CRISPR/Cas9                      | Plant height was reduced<br>50%, inflorescences were<br>increased 500%, locule<br>number was increase<br>350%, and lycopene<br>accumulation was 500%<br>higher in edited plants than<br>WT plants                                                                                                                                   | Greenhouse | (Zsögön <i>et al.</i> ,<br>2018)                       |
| Tomato<br>( <i>Solanum lycopersicum</i> )          | 'Moneyberg',<br>'Ailsa Craig',<br>and 'AC'          | Fruit development<br>and ripening                                                                                             | <i>AP2a</i> , <i>NAC-NOR</i> ,<br><i>FUL1</i> , and <i>FUL2</i>                         | Key regulators of<br>ethylene production and<br>fruit ripening                                                                                       | CRISPR/Cas9                      | AP2a mutants exhibited an<br>earlier ripening, fruits<br>reached the Breaker stage<br>in 39-41 days, whereas in<br>the wild-type was reached<br>in 47 days. Pericarp of<br>AP2a mutants remained<br>orange/brown, compared<br>with the fully red of the<br>wild-type. NOR mutants<br>ripened 3 days later than<br>wild-type fruits. | Greenhouse | (R. Wang <i>et al.</i> ,<br>2019)                      |
| Watermelon<br>( <i>Citrullus lanatus</i> )         | 'ZG94'                                              | Increased herbicide<br>resistance                                                                                             | <i>ALS</i>                                                                              | Key enzyme in branched<br>amino acid biosynthesis                                                                                                    | CRISPR/Cas9                      | ALS homozygous mutants<br>were not affected after 14<br>days of a treatment with<br>tribenuron (a broad weed<br>controlling herbicide),<br>whereas WT plants were<br>severely damaged (visual<br>evaluation)                                                                                                                        | Greenhouse | (Yu and Powles,<br>2014; Tian <i>et al.</i> ,<br>2018) |
| Walnut ( <i>Juglans regia</i> )                    | 'Sunland'                                           | Increased resistance<br>to <i>Cydia pomonella</i>                                                                             | <i>cryIA</i> from <i>Bacillus thuringiensis</i>                                         | Insecticidal crystal protein<br>fragments (1CPFs)                                                                                                    | Transgenesis<br>(gene silencing) | Codling moth mortality was<br>80-100% in transgenic<br>walnuts versus 9.2% in WT                                                                                                                                                                                                                                                    | Greenhouse | (Dandekar <i>et al.</i> ,<br>1998)                     |
| Watermelon<br>( <i>Citrullus lanatus</i> )         | 'Feeling', 'China<br>Baby', and<br>'Quality'        | Resistance to<br>Zucchini yellow<br>mosaic virus (ZYMV)<br>and Papaya ringspot<br>virus type W (PRSV<br>W)                    | Truncated ZYMV<br>and PRSVW CP                                                          | Coat protein, it confers<br>resistance to ZYMV and<br>PRSV W                                                                                         | Transgenesis<br>(gene silencing) | A transgenic line<br>exhibited 100% resistance<br>to ZYMV and PRSV W<br>after 4 weeks of virus<br>inoculation (visual<br>evaluation) and all plants<br>from this line were virus-<br>negative by Western blot                                                                                                                       | Greenhouse | (Yu <i>et al.</i> , 2011)                              |
| Watermelon<br>( <i>Citrullus lanatus</i> )         | 'Feeling'                                           | Increased resistance<br>to Watermelon silver<br>mottle virus<br>(WSMoV),<br>Cucumber mosaic<br>virus (CMV),<br>Cucumber green | partial <i>N</i> gene from<br>WSMoV, and partial<br>CP from CMV,<br>CGMMV, and WMV      | Nucleocapsid (N) and<br>coat protein (CP) confer<br>resistant to WSMoV,<br>CMV, CGMMV, and<br>WMV                                                    | Transgenesis<br>(gene silencing) | In two transgenic lines,<br>100% of the plants did not<br>show symptoms during 5<br>weeks of observation after<br>the inoculation of the virus<br>individually and collectively.<br>Viruses were not detected                                                                                                                       | Greenhouse | (Lin <i>et al.</i> , 2012)                             |

|                                           |                |                                                                        |                                                      |                                                                                                                                   |                                                  |                                                                                                                                                                   |            |                                 |
|-------------------------------------------|----------------|------------------------------------------------------------------------|------------------------------------------------------|-----------------------------------------------------------------------------------------------------------------------------------|--------------------------------------------------|-------------------------------------------------------------------------------------------------------------------------------------------------------------------|------------|---------------------------------|
|                                           |                | mottle mosaic virus (CGMMV), and Watermelon mosaic virus (WMV)         |                                                      |                                                                                                                                   |                                                  | by ELISA in these two lines.                                                                                                                                      |            |                                 |
| Pear ( <i>Pyrus communis</i> )            | 'Duli'         | Plant size                                                             | <i>PAT14</i>                                         | S-acyltransferase, involved in stem and leaf development via endogenous hormone signaling                                         | CRISPR/Cas9 targeted mutagenesis                 | Transgenic plants were 67% smaller than WT plants                                                                                                                 | Laboratory | (Pang <i>et al.</i> , 2019)     |
| Pummelo ( <i>Citrus grandis</i> )         | N.A.           | Increased tolerance to cold stress                                     | <i>PttrbHLH</i> from <i>Poncirus trifoliata</i>      | Transcription factor regulating plant responses to abiotic stress                                                                 | Transgenesis (Overexpression)                    | Electrolyte leakage in transgenic plants was 13% lower compared to WT (25%). Proline content was higher in transgenic plants (210-250 µg/g) compare WT (150 µg/g) | Laboratory | (Geng <i>et al.</i> , 2019)     |
| Grapefruit ( <i>Citrus paradisi</i> )     | 'Duncan'       | Improved palatability by altering flavonoid accumulation               | <i>CHS</i> and <i>CHI</i> sense and antisense        | Chalcone synthase and chalcone isomerase catalyze the formation of naringenin chalcone and its conversion to naringenin flavanone | Transgenesis (Overexpression and gene silencing) | Transgenic plants had 28% less total flavonoid content than WT                                                                                                    | Laboratory | (Koca <i>et al.</i> , 2009)     |
| Wild strawberry ( <i>Fragaria vesca</i> ) | 'Hawaii 4'     | Auxin content                                                          | <i>YUC10</i>                                         | Protein involved in auxin biosynthesis                                                                                            | CRISPR/Cas9                                      | Free auxin decreased 40% in young fruit of <i>YUC10</i> -mutants compared with WT                                                                                 | Laboratory | (Feng <i>et al.</i> , 2019)     |
| Tomato ( <i>Solanum lycopersicum</i> )    | 'Money Maker'  | Increased resistance to powdery mildew ( <i>Oidium neolyopersici</i> ) | <i>Mlo1</i>                                          | Negative regulator of powdery mildew resistance                                                                                   | CRISPR/Cas9                                      | Leaves of <i>Mlo</i> -mutants did not show chlorotic spots 5 weeks post inoculation (visual evaluation)                                                           | Laboratory | (Nekrasov <i>et al.</i> , 2017) |
| Kiwifruit ( <i>Actinidia deliciosa</i> )  | N.A.           | Delayed ripening                                                       | <i>ACO</i> from <i>Actinidia deliciosa</i>           | 1-aminocyclopropane-1-carboxylic acid oxidase involved in ethylene biosynthesis                                                   | Transgenesis (overexpression)                    | Ethylene production was totally inhibited in transgenic plants whereas control plants produced 1 µmol/kg s                                                        | Laboratory | (Atkinson <i>et al.</i> , 2011) |
| Apple ( <i>Malus x domestica</i> )        | 'M36'          | Increased rooting capacity                                             | <i>rolB</i> from <i>Agrobacterium tumefaciens</i>    | Induces adventitious root formation in woody plants                                                                               | Transgenesis (Overexpression)                    | Stem discs of transformed clones developed more roots (10 vs. 2) and had higher rooting capacity (>70% vs. 10%) than control plants                               | Laboratory | (Welander <i>et al.</i> , 1998) |
| Apple ( <i>Malus x domestica</i> )        | 'M9/29'        | Increased rooting capacity                                             | <i>rolB</i> from <i>A. Agrobacterium tumefaciens</i> | Induces adventitious root formation in woody plants                                                                               | Transgenesis (Overexpression)                    | The root number in clones increased (3-9) compared to control plants (1). 83-100% of the tested clones rooted whereas only 1% of control plants did               | Laboratory | (Zhu <i>et al.</i> , 2001)      |
| Apple ( <i>Malus x domestica</i> )        | 'Greensleeves' | Sorbitol production                                                    | <i>A6PR</i>                                          | Aldose-6-P reductase that catalyzes the conversion of glucose-6-P into sorbitol-6-P                                               | Transgenesis (Gene silencing)                    | Sorbitol content was reduced 66% relative to WT. Sucrose and starch content increased (150% and 87%, respectively) in mature leaves                               | Laboratory | (Cheng <i>et al.</i> , 2005)    |
| Apple ( <i>Malus x domestica</i> )        | 'Elstar E94'   | Decreased allergen content                                             | <i>Mald1</i>                                         | Apple allergen                                                                                                                    | Transgenesis (Gene silencing)                    | Reactivity (SPT/ histamine ratio) decreased 70%                                                                                                                   | Laboratory | (Gilissen <i>et al.</i> , 2005) |
| Apple                                     | 'Royal Gala'   | Fruit color                                                            | <i>MYB10</i> from <i>M.</i>                          | Transcription factor                                                                                                              | Transgenesis                                     | HPLC analysis of <i>MYB10</i>                                                                                                                                     | Laboratory | (Espley <i>et al.</i> ,         |

|                                                   |                                   |                                                                        |                                                   |                                                                                                     |                                    |                                                                                                                                                                                                                                              |                           |                                       |
|---------------------------------------------------|-----------------------------------|------------------------------------------------------------------------|---------------------------------------------------|-----------------------------------------------------------------------------------------------------|------------------------------------|----------------------------------------------------------------------------------------------------------------------------------------------------------------------------------------------------------------------------------------------|---------------------------|---------------------------------------|
| ( <i>Malus</i> × <i>domestica</i> )               |                                   |                                                                        | <i>domestica</i> 'Red field'                      | regulating anthocyanin accumulation in apple                                                        | (Overexpression)                   | transgenic apple leaves showed a predominant peak of cyanidin-3-galactoside (480 mAU) whereas no peak was observed in control plants                                                                                                         |                           | 2007)                                 |
| Apple ( <i>Malus</i> × <i>domestica</i> )         | 'M26'                             | Increased tolerance to salinity stress                                 | <i>NHX1</i>                                       | Vacuolar Na <sup>+</sup> /H <sup>+</sup> antiporter                                                 | Transgenesis (Overexpression)      | Na <sup>+</sup> content increased 50% in roots and decreased 27% in leaves, K <sup>+</sup> increased 30% in roots and 50% in leaves when transgenic plants were grown at 150 mM NaCl (relative to WT plants grown under the same conditions) | Laboratory                | (Li <i>et al.</i> , 2010)             |
| Apple ( <i>Malus</i> × <i>domestica</i> )         | 'Gala' and 'Golden Delicious'     | Reduced susceptibility to <i>E. amylovora</i>                          | <i>DIPM4</i>                                      | Susceptibility factor that interacts with a disease-specific gene of <i>E. amylovora</i>            | Targeted mutagenesis (CRISPR/Cas9) | Necrosis was reduced on average 50% in both apple varieties relative to their controls                                                                                                                                                       | Laboratory                | (Pompili <i>et al.</i> , 2020)        |
| Apple ( <i>Malus</i> × <i>domestica</i> )         | 'Gala'                            | Floral initiation                                                      | <i>TFL1</i>                                       | Floral repressor                                                                                    | Targeted mutagenesis (CRISPR/Cas9) | 93% of the transgenic lines flowered within 3 to 6 months                                                                                                                                                                                    | Laboratory                | (Charrier <i>et al.</i> , 2019)       |
| Pear ( <i>Pyrus communis</i> )                    | 'Conference'                      | Floral initiation                                                      | <i>TFL1</i>                                       | Floral repressor                                                                                    | Targeted mutagenesis (CRISPR/Cas9) | Early flowering (within 4-12 months) was observed in 9% of transgenic lines                                                                                                                                                                  | Laboratory                | (Charrier <i>et al.</i> , 2019)       |
| <i>Vitis berlandieri</i> × <i>Vitis rupestris</i> | 'Richter'                         | Increased tolerance to salinity and oxidative stress                   | <i>Fer</i> from <i>Medicago sativa</i>            | Ferritin is an iron storing protein                                                                 | Transgenesis (Overexpression)      | Photosynthesis loss was 50% in transformed lines vs. 65% in WT. Under oxidative stress, the photosynthesis loss was 45% in transformed lines vs. 79% in WT.                                                                                  | Laboratory                | (Zok <i>et al.</i> , 2010)            |
| Cucumber ( <i>Cucumis sativus</i> )               | N.A.                              | Gynoecism                                                              | <i>WIP1</i>                                       | Inhibitor of carpel development                                                                     | Targeted mutagenesis (CRISPR/Cas9) | Mutants have 7 times more females flowers than WT                                                                                                                                                                                            | Laboratory                | (Hu <i>et al.</i> , 2017)             |
| Grapefruit ( <i>Citrus paradisi</i> )             | 'Ruby', 'Red', 'Rio' and 'Duncan' | Increased resistance to Citrus tristeza virus (CTV)                    | <i>Ctv-R</i> from <i>P. trifoliata</i>            | CTV resistant gene                                                                                  | Transgenesis (Overexpression)      | Presence of the virus was not detected by Northern blotting 16 and 24 weeks after inoculation                                                                                                                                                | Laboratory                | (Rai, 2006)                           |
| Lemon ( <i>Citrus limon</i> )                     | 'Femminello siracusano'           | Increased resistance to <i>Botrytis cinerea</i>                        | <i>Chit42</i> from <i>Trichoderma harzianum</i>   | Endochitinase which hydrolyses chitin                                                               | Transgenesis (Overexpression)      | For <i>B. cinerea</i> , transgenic plants had reduced disease diffusion (40%-60%) compared to WT (90%)                                                                                                                                       | Laboratory                | (Gentile <i>et al.</i> , 2007)        |
| Sweet orange ( <i>Citrus sinensis</i> )           | 'Hamlin'                          | Increased resistance to <i>Xanthomonas axonopodis</i> pv. <i>citri</i> | <i>hrpN</i> from <i>E. amylovora</i>              | Harpin protein which elicits the hypersensitive response and systemic acquired resistance in plants | Transgenesis (Overexpression)      | Disease severity of lines transgenic lines was reduced up to 79% relative to WT                                                                                                                                                              | Laboratory and greenhouse | (Barbosa-Mendes <i>et al.</i> , 2009) |
| Sweet orange ( <i>Citrus sinensis</i> )           | 'Natal', 'Pera', 'Valencia'       | Increased resistance to <i>Xanthomonas citri</i> subsp. <i>citri</i>   | <i>attA</i> from <i>Trichoplusia Ni</i>           | Antimicrobial peptide that increases membrane permeability in Gram negative bacteria                | Transgenesis (Overexpression)      | In transgenic plants, the diseased leaf area ranged from 0.16 to 0.30% opposed to 0.72% on control plants                                                                                                                                    | Laboratory                | (Cardoso <i>et al.</i> , 2010)        |
| Sweet orange ( <i>Citrus sinensis</i> )           | 'Anliucheng'                      | Increase resistance to <i>X. axonopodis</i> pv. <i>citri</i>           | <i>SPDS1</i> from <i>Malus</i> × <i>domestica</i> | Spermidin synthase involved in polyamines biosynthesis                                              | Transgenesis (Overexpression)      | Putrescine content increased 200% in transgenic plants relative to                                                                                                                                                                           | Laboratory                | (Fu <i>et al.</i> , 2011)             |

|                                          |                                                                 |                                                               |                                                |                                                                                                                                     |                                                  |                                                                                                                                                                                                                                  |            |                                      |
|------------------------------------------|-----------------------------------------------------------------|---------------------------------------------------------------|------------------------------------------------|-------------------------------------------------------------------------------------------------------------------------------------|--------------------------------------------------|----------------------------------------------------------------------------------------------------------------------------------------------------------------------------------------------------------------------------------|------------|--------------------------------------|
|                                          |                                                                 |                                                               |                                                |                                                                                                                                     |                                                  | WT. Disease index of WT was 55 times higher than in transgenic plants                                                                                                                                                            |            |                                      |
| Grapefruit ( <i>Citrus paradisi</i> )    | 'Duncan'                                                        | Increased resistance to <i>X. citri</i> subsp. <i>Citri</i>   | <i>LOB1</i>                                    | Susceptibility gene for citrus canker                                                                                               | Targeted mutagenesis (CRISPR/Cas9)               | No canker symptoms were observed on 66% of transgenic plants at 4 days post-inoculation, whereas WT plants showed severe disease symptoms.                                                                                       | Laboratory | (Jia <i>et al.</i> , 2017)           |
| Melon ( <i>Cucumis melo</i> )            | 'Prince'                                                        | Resistance to Cucumber green mottle mosaic virus (CGMMV)      | <i>DR</i> from Cowpea mosaic virus (CPMV)      | Direct repeat (DR) of the movement protein (MP) of CPMV                                                                             | Transgenesis (Gene silencing)                    | Transgenic lines had 25% less CGMMV and did not show symptoms                                                                                                                                                                    | Laboratory | (Emran <i>et al.</i> , 2012)         |
| Grapevine ( <i>Vitis vinifera</i> )      | 'Portan'                                                        | Response to hypoxia                                           | <i>Adh2</i> from <i>Vitis vinifera</i>         | Alcohol dehydrogenase 2 involved in plant development and response to abiotic stress                                                | Transgenesis (overexpression and gene silencing) | Under hypoxia, ADH activity in sense lines was 5-times higher than in control and antisense lines. Under aerobic conditions, terpene emission increased 5-fold in sense lines than in control and antisense lines                | Laboratory | (Tesniere <i>et al.</i> , 2006)      |
| Grapevine ( <i>Vitis vinifera</i> )      | 'Maccabeu', 'Chardonnay', 'Syrah', 'Portran', and 'Tempranillo' | Increased anthocyanin content                                 | <i>VlmybA</i> 1-2 from <i>Vitis labruscana</i> | Transcription factor involved in anthocyanin biosynthesis                                                                           | Transgenesis (overexpression)                    | Transgenic lines had 35% more malvidin in roots than WT                                                                                                                                                                          | Laboratory | (Cutanda-Perez <i>et al.</i> , 2009) |
| Grapevine ( <i>Vitis vinifera</i> )      | 'Centennial Seedless'                                           | Increased tolerance to cold stress                            | <i>DREB1b</i> from <i>A. thaliana</i>          | Cold-inducible transcription factor for COR genes                                                                                   | Transgenesis (overexpression)                    | After cold treatment 26% of transgenic plants wilted, compared with 98% in WT. 95% recovered, compared with 2% in WT                                                                                                             | Laboratory | (Jin <i>et al.</i> , 2009)           |
| Kiwifruit ( <i>Actinidia deliciosa</i> ) | N.A.                                                            | Resistance to fruit-piercing moth ( <i>Oraesia excavate</i> ) | <i>SbtCry1Ac</i> (Synthetic chimeric)          | CryIAc insecticidal protein                                                                                                         | Transgenesis (overexpression)                    | Control plants had 63.4% leaf damage, whereas transgenic plants had 21.3% leaf damage                                                                                                                                            | Laboratory | (Zhang, Liu and Liu, 2015)           |
| Pear ( <i>Pyrus communis</i> )           | 'Ballad'                                                        | Tolerance to salinity, osmotic and copper stress              | <i>SPDS1</i> from <i>Malus domestica</i>       | Spermidine synthase that catalyses the conversion of putrescine to spermidine <i>SPDS1</i> is also involved abiotic stress response | Transgenesis (overexpression)                    | Weight of transgenic shoots was similar under salinity, and copper stress and control conditions, whereas in control shoots it decreased 60%. Osmotic stress reduced weight 30% in transgenic shoots and 100% in control shoots. | Laboratory | (Wen <i>et al.</i> , 2008)           |
| Pear ( <i>Pyrus communis</i> )           | 'La France' and 'Ballade'                                       | Floral initiation                                             | <i>FT</i> from <i>Citrus unshiu</i>            | <i>FLOWERING LOCUS T</i> is a floral pathway integrator                                                                             | Transgenesis (overexpression)                    | Floral buds developed in 50% of transgenic plants 4-weeks after transferred to micropropagation medium, whereas control plants did not develop any floral bud                                                                    | Laboratory | (Matsuda <i>et al.</i> , 2009)       |
| Plum ( <i>Prunus domestica</i> )         | 'Stanley'                                                       | Increased resistance to Plum pox virus (PPV)                  | <i>h-UTR/P1</i>                                | PPV-derived hairpin construct which confers PPV resistance                                                                          | Transgenesis (gene silencing)                    | Out of a total of 96 successful grafts, 6 apices did not contain PPV at the end of the experiment (6.2%)                                                                                                                         | Laboratory | (Monticelli <i>et al.</i> , 2012)    |
| Plum ( <i>Prunus</i> )                   | 'Angelino' and                                                  | Increased resistance                                          | Hairpins <i>eIFiso4E</i> ,                     | Eukaryotic translation                                                                                                              | Transgenesis                                     | A transgenic line tested                                                                                                                                                                                                         | Laboratory | (Rubio <i>et al.</i> ,               |

|                                                          |                               |                                                                                                                                                                 |                                                                                                                                                                |                                                                                                                         |                                    |                                                                                                                                                                                                                                |                             |                                       |
|----------------------------------------------------------|-------------------------------|-----------------------------------------------------------------------------------------------------------------------------------------------------------------|----------------------------------------------------------------------------------------------------------------------------------------------------------------|-------------------------------------------------------------------------------------------------------------------------|------------------------------------|--------------------------------------------------------------------------------------------------------------------------------------------------------------------------------------------------------------------------------|-----------------------------|---------------------------------------|
| <i>salicina</i> )                                        | 'Larry-Ann'                   | to Plum pox virus (PPV)                                                                                                                                         | <i>elFiso4G</i> , <i>elFiso4G11</i> , and <i>elFiso4G10</i>                                                                                                    | initiation complex indispensable for viral infection.                                                                   | (gene silencing)                   | negative for PPV infection after PPV challenge for five vegetative cycles                                                                                                                                                      |                             | 2019)                                 |
| Tomato ( <i>Solanum lycopersicum</i> )                   | 'Money Maker'                 | Resistance to a range of phytopathogenic bacteria                                                                                                               | <i>EFR</i> from <i>Arabidopsis thaliana</i>                                                                                                                    | Pattern-recognition receptor that detects microbes by recognizing conserved pathogen-associated molecular patterns      | Transgenesis (overexpression)      | Bacterial population was lower in <i>EFR</i> -mutants (6.5 log CFU/cm <sup>2</sup> ) than in WT plants (8 log CFU/ cm <sup>2</sup> )                                                                                           | Laboratory                  | (Lacombe <i>et al.</i> , 2010)        |
| Tomato ( <i>Solanum lycopersicum</i> )                   | 'M82'                         | Fruit size and inflorescence                                                                                                                                    | Cis-regulatory element of <i>CLV3</i>                                                                                                                          | CLAVATA controls locule number and fruit size                                                                           | CRISPR/Cas9                        | Flowers of <i>CLV3</i> -mutants had more sepals, petals, stamen, and fruit locule number than WT (100%, 60%, 140% and 400% increase, respectively)                                                                             | Laboratory                  | (Rodríguez-Leal <i>et al.</i> , 2017) |
| Tomato ( <i>Solanum lycopersicum</i> )                   | N.A.                          | Increased tolerance to drought                                                                                                                                  | <i>NPR1</i>                                                                                                                                                    | Non-expressor of pathogenesis-related gene is involved in plant defense against pathogens                               | CRISPR/Cas9                        | Survival rate of <i>NPR1</i> mutants was 20 to 50% after drought, whereas 80% of WT survived. Stomatal aperture was 3.5 times higher in mutants than in WT                                                                     | Laboratory                  | (Li <i>et al.</i> , 2019)             |
| Walnut ( <i>Juglans hindsii</i> x <i>Juglans regia</i> ) | 'J1' and 'RR4'                | Increased crown gall and nematode resistance                                                                                                                    | <i>A. tumefaciens</i> self-complementary <i>iaaM</i> and <i>ipt</i> . <i>Pratylenchus vulnus</i> self-complementary <i>Pv010</i> . <i>A. rhizogenes rolABC</i> | Resistance to <i>A. tumefaciens</i> , <i>P. vulnus</i> , and <i>A. rhizogenes</i>                                       | Transgenesis (gene silencing)      | Transgenic plants showed 79% less nematodes per root after <i>in vitro</i> co-culture than non-transformed plants and complete crown gall control                                                                              | Laboratory                  | (Walawage <i>et al.</i> , 2013)       |
| Apple ( <i>Malus x domestica</i> )                       | 'Greensleeves'                | Reduced ethylene production to modify fruit flavor                                                                                                              | ACS ACO                                                                                                                                                        | 1- aminocyclopropane-1-carboxylic acid synthase and oxidase, enzymes responsible for ethylene biosynthesis              | Transgenesis (Gene silencing)      | Ethylene production decreased 60% relative to WT. Firmness increased 20% and color hue angle increased 4%. Soluble solids and acidity were comparable to those in WT                                                           | Laboratory and Field trials | (Dandekar <i>et al.</i> , 2004)       |
| Tomato ( <i>Solanum lycopersicum</i> )                   | 'Micro-Tom' and 'Ailsa Craig' | Parthenocarpy                                                                                                                                                   | <i>IAA9</i>                                                                                                                                                    | Negative regulator of parthenocarpy                                                                                     | CRISPR/Cas9                        | WT fruits had 15 seeds whereas transgenic lines had 0-4 seeds per fruit.                                                                                                                                                       | N.A.                        | (Ueta <i>et al.</i> , 2017)           |
| Banana ( <i>Musa spp.</i> )                              | 'Grand Naine' and 'Rasthali'  | Increased $\beta$ -carotene content                                                                                                                             | <i>LCYE</i>                                                                                                                                                    | Lycopene $\epsilon$ -cyclase, which converts lycopene into $\alpha$ -carotene                                           | Targeted mutagenesis (CRISPR/Cas9) | Edited lines accumulated $\beta$ -carotene up to 6-fold                                                                                                                                                                        | Net-house                   | (Kaur <i>et al.</i> , 2020)           |
| Cucumber ( <i>Cucumis sativus</i> )                      | 'Ilan'                        | Increased resistance to Cucumber vein yellowing virus (CVYV), Zucchini yellow mosaic virus (ZYMV), Papaya ringspot virus (PRSV) and Cucumber mosaic virus (CMV) | <i>elF4E</i>                                                                                                                                                   | Eukaryotic translation initiation factor 4E, which interacts with viral encoded proteins and promotes virus infectivity | Targeted mutagenesis (CRISPR/Cas9) | No symptoms of CVYV, ZYMV, and PRSV infection were developed in transgenic plants (0/20) whereas 60 of 60 WT plants showed symptoms. High susceptibility to CMV infection was observed in both transgenic (11/11) and WT (9/9) | Net-house                   | (Chandrasekaran <i>et al.</i> , 2016) |

<sup>a</sup> Direct DNA delivery

N.A. Not available
